# Supplementary material
Source: PubMed Central journal article supplement (PMC3323038)

Fig. S1. Membrane resealing failure in myoblasts harboring two DYSF null alleles. Quantification of relative fluorescence intensity over time after laser-induced injury of ULM1/01 myoblasts (harboring two null dysferlin alleles) treated with 12  $\mu$ M Lactacystin (A) or 50 nM of Velcade (B) reveals no effect on plasmalemmal resealing kinetics. Transfection of these cells with GFP-dysferlin reinstates membrane resealing capability, measured with FM4-64 instead of FM1-43, so as not to interfere with the fluorescence emitted by the GFP epitope (C). Numbers of individual measurements are as follows: for Lactacystin: 0  $\mu$ M (n= 8) and 12  $\mu$ M (n= 12); for Velcade: 0 nM (n= 10) and 50 nM (n=10); for GFP (n=8) and GFP-dysferlin (n=12) Data are presented as means plus one standard deviation.

Figure S1

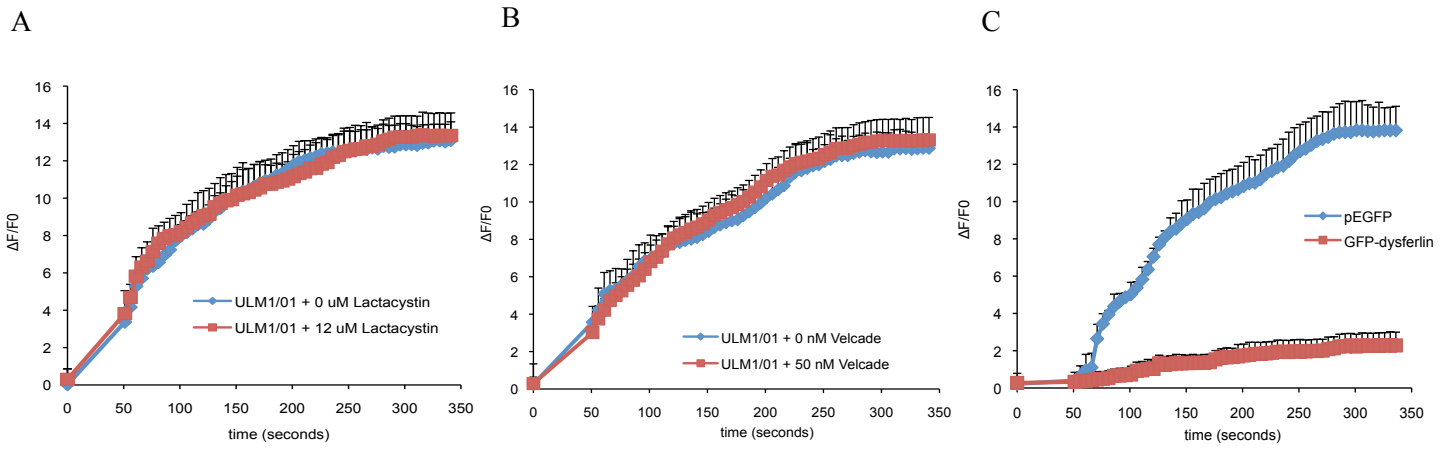

Supplement: supp_M111.329078_jbc.M111.329078-1.pdf [file supp_M111.329078_jbc.M111.329078-1.pdf]
